# Supplementary material for: Gas sensing properties of nanocrystalline diamond at room temperature
Source: publisher site journal article supplement (doi:10.3762/bjnano.5.243), 2014-12-04
Supplement: Additional file 1 [file 2190-4286-5-243-S1.pdf]

# Supporting Information

## for

### Gas sensing properties of nanocrystalline diamond

### at room temperature

Marina Davydova<sup>1\*</sup>, Pavel Kulha<sup>2</sup>, Alexandr Laposa<sup>2</sup>, Karel Hruska<sup>1</sup>, Pavel Demo<sup>1</sup> and Alexander Kromka<sup>1</sup>

Address: <sup>1</sup>Institute of Physics, Academy of Science of the Czech Republic, Cukrovarnicka 10, 16200 Prague, Czech Republic and <sup>2</sup>Department of Microelectronics, Faculty of Electrical Engineering, CTU in Prague, Technicka 2, 16627 Prague, Czech Republic

Email: Marina Davydova\* - davydova@fzu.cz

\* Corresponding author

### Additional AFM and XRD experimental results

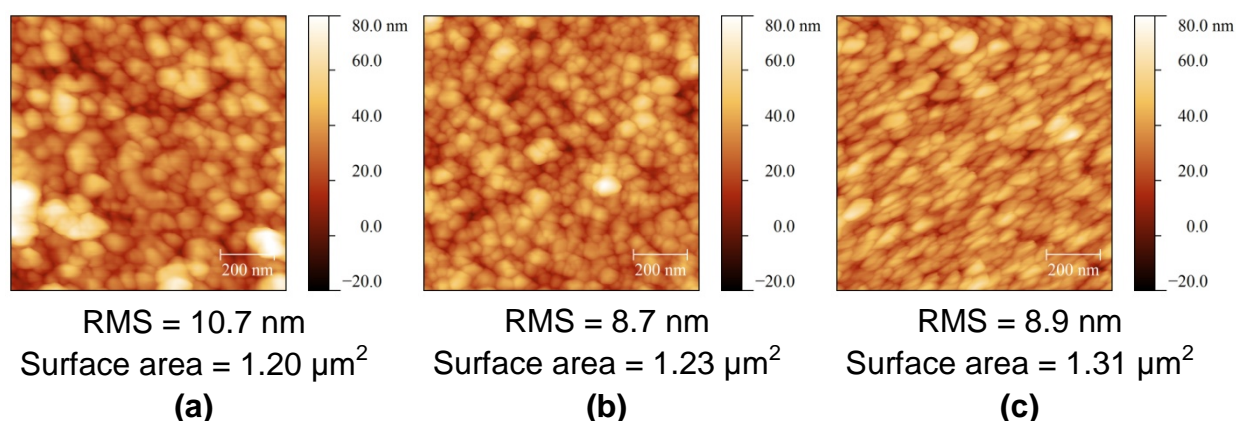

**Figure S1:** AFM surface topography of the deposited NCD-coated sensor substrate: **(a)** with separation of 200  $\mu\text{m}$  and nucleation time of 40 min **(b)** with separation of 50  $\mu\text{m}$  and seeding time of 40 min, and **(c)** with separation of 50  $\mu\text{m}$  and nucleation time of 2 min.

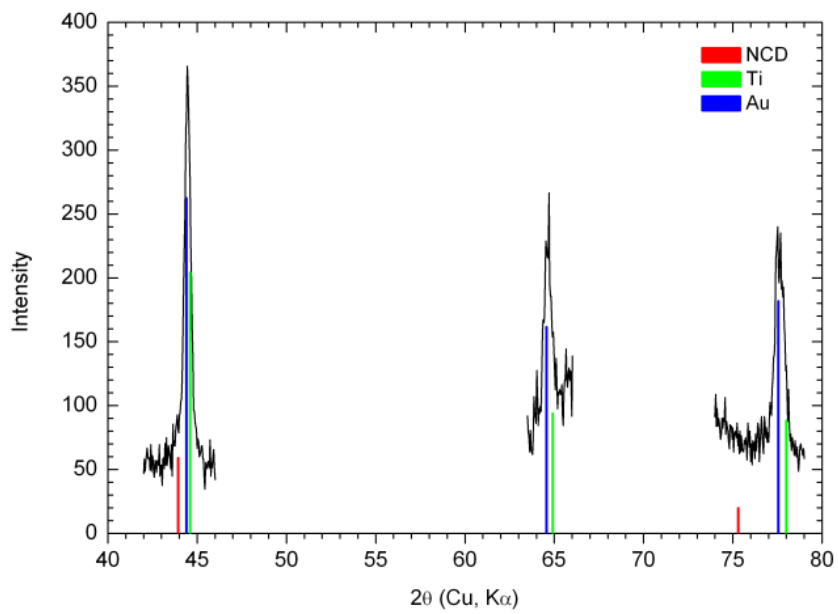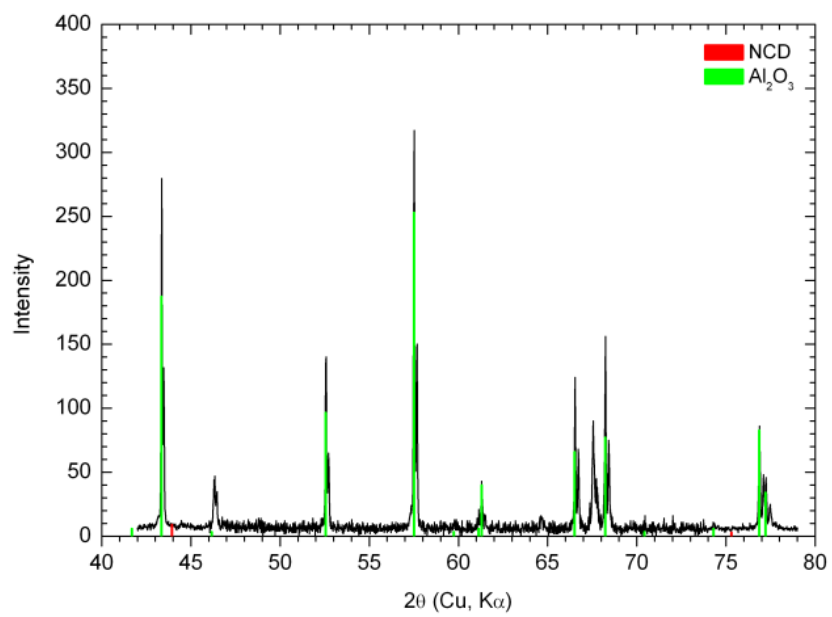

**Figure S2:** XRD patterns of sensor substrates covered with H-terminated diamond.
